# Supplementary material for: Analysis of complexity measures and information planes of selected molecules in position and momentum spaces
Source: Royal Society of Chemistry journal article supplement (doi:10.1039/b927055h), 2010-01-01
Supplement: b927055h.pdf [file b927055h.pdf]

## Supplementary Material:

# Analysis of complexity measures and information planes of selected molecules in position and momentum spaces

Rodolfo O. Esquivel, Juan Carlos Angulo, Juan Antolín, Jesús S. Dehesa, and Sheila López-Rosa

5

Table S1. Chemical properties: energy (a.u.), dipole moment (debye), ionization potential (a.u.), hardness (a.u.) and electrophilicity (a.u.)

| <i>Chemical Formula</i>         | <i>Name</i>         | <i>Number of Electrons</i> | <i>Energy</i> | <i>Dipole Moment</i> | <i>Ionization Potential</i> | <i>Hardness</i> | <i>Electrophilicity</i> |
|---------------------------------|---------------------|----------------------------|---------------|----------------------|-----------------------------|-----------------|-------------------------|
| NH <sub>3</sub>                 | Ammonia             | 10                         | -56.420       | 1.7877               | 0.422                       | 0.321           | 0.016                   |
| LiOH                            | Lithium Hydroxide   | 12                         | -83.165       | 4.576                | 0.364                       | 0.190           | 0.080                   |
| Li <sub>2</sub> O               | Dilithium Oxide     | 14                         | -90.026       | 0.000                | 0.267                       | 0.150           | 0.046                   |
| HBO                             | Boron Hydride Oxide | 14                         | -100.468      | 2.840                | 0.510                       | 0.339           | 0.043                   |
| HCO                             | Formyl Radical      | 15                         | -113.565      | 1.587                | 0.387                       | 0.260           | 0.031                   |
| NO                              | Nitric Oxide        | 15                         | -129.534      | 2.003                | 0.421                       | 0.259           | 0.050                   |
| H <sub>2</sub> CO               | Formaldehyde        | 16                         | -114.228      | 2.517                | 0.438                       | 0.288           | 0.039                   |
| NHO                             | Nitrosyl Hydride    | 16                         | -130.178      | 1.786                | 0.425                       | 0.259           | 0.053                   |
| O <sub>2</sub>                  | Oxygen              | 16                         | -149.948      | 0.000                | 0.552                       | 0.491           | 0.004                   |
| CH <sub>3</sub> O               | Methoxy Radical     | 17                         | -114.797      | 3.355                | 0.387                       | 0.363           | 0.001                   |
| CH <sub>3</sub> NH <sub>2</sub> | Methyl Amine        | 18                         | -95.589       | 1.4985               | 0.387                       | 0.307           | 0.011                   |
| CH <sub>3</sub> OH              | Methyl Alcohol      | 18                         | -115.435      | 1.945                | 0.444                       | 0.334           | 0.018                   |
| NH <sub>2</sub> OH              | Hydroxylamine       | 18                         | -131.410      | 0.901                | 0.424                       | 0.326           | 0.015                   |
| H <sub>2</sub> O <sub>2</sub>   | Hydrogen Peroxide   | 18                         | -151.216      | 1.751                | 0.474                       | 0.346           | 0.024                   |
| NaOH                            | Sodium Hydroxide    | 20                         | -237.541      | 6.888                | 0.477                       | 0.159           | 0.319                   |
| HCCO                            | Ketenyl Radical     | 21                         | -113.859      | 1.762                | 0.411                       | 0.312           | 0.016                   |

|             |                     |    |          |       |       |       |       |
|-------------|---------------------|----|----------|-------|-------|-------|-------|
| $C_3H_3$    | Radical Propargyl   | 21 | -115.643 | 0.181 | 0.351 | 0.282 | 0.009 |
| $BO_2$      | Boron Dioxide       | 21 | -174.884 | 0.000 | 0.533 | 0.361 | 0.041 |
| $MgOH$      | Magnesium Hydroxide | 21 | -275.346 | 5.737 | 0.271 | 0.160 | 0.039 |
| $CH_2CCH_2$ | Allene              | 22 | -116.289 | 0.000 | 0.371 | 0.275 | 0.017 |
| $CH_3CCH$   | Propyne             | 22 | -116.292 | 0.733 | 0.346 | 0.300 | 0.004 |
| $C_3H_4$    | Cyclopropene        | 22 | -116.292 | 0.733 | 0.346 | 0.264 | 0.013 |
| $CH_3CN$    | Acetonitrile        | 22 | -132.221 | 4.629 | 0.457 | 0.331 | 0.024 |
| $CH_3NC$    | Methyl Isocyanide   | 22 | -132.340 | 3.808 | 0.464 | 0.334 | 0.025 |
| $CH_2NN$    | Diazomethane        | 22 | -148.326 | 4.502 | 0.391 | 0.231 | 0.056 |
| $NH_2CN$    | Cyanamide           | 22 | -148.388 | 4.502 | 0.391 | 0.305 | 0.012 |
| $HCCOH$     | Ethynol             | 22 | -152.141 | 1.747 | 0.371 | 0.282 | 0.014 |
| $CH_2CO$    | Ketene              | 22 | -152.197 | 1.461 | 0.361 | 0.249 | 0.025 |
| $HN_3$      | Hydrogen Azide      | 22 | -164.349 | 1.961 | 0.398 | 0.268 | 0.032 |
| $HCNO$      | Fulminic Acid       | 22 | -168.134 | 3.248 | 0.403 | 0.294 | 0.020 |
| $HOCN$      | Cyanic Acid         | 22 | -168.223 | 3.891 | 0.453 | 0.305 | 0.036 |
| $HNCO$      | Isocyanic Acid      | 22 | -168.261 | 2.238 | 0.447 | 0.308 | 0.031 |
| $N_2O$      | Nitrous Oxide       | 22 | -184.212 | 0.426 | 0.489 | 0.324 | 0.042 |

|                                 |                          |    |          |       |       |       |       |
|---------------------------------|--------------------------|----|----------|-------|-------|-------|-------|
| CO <sub>2</sub>                 | Carbon Dioxide           | 22 | -188.150 | 0.000 | 0.539 | 0.377 | 0.035 |
| FCN                             | Cyanogen Fluoride        | 22 | -192.205 | 2.147 | 0.498 | 0.360 | 0.026 |
| HBS                             | Hydrogen Boron Sulfide   | 22 | -423.039 | 1.397 | 0.401 | 0.250 | 0.046 |
| C <sub>3</sub> H <sub>5</sub>   | Allyl Radical            | 23 | -116.874 | 0.923 | 0.333 | 0.281 | 0.005 |
| CH <sub>3</sub> CO              | Acetyl Radical           | 23 | -152.755 | 2.428 | 0.360 | 0.258 | 0.020 |
| NO <sub>2</sub>                 | Nitrogen Dioxide         | 23 | -204.636 | 0.078 | 0.499 | 0.290 | 0.075 |
| PO                              | Phosphorus Monoxide      | 23 | -415.862 | 0.135 | 0.327 | 0.175 | 0.067 |
| NS                              | Mononitrogen Monosulfide | 23 | -452.183 | 1.971 | 0.354 | 0.186 | 0.077 |
| C <sub>3</sub> H <sub>6</sub>   | Cyclopropane             | 24 | -117.518 | 0.000 | 0.417 | 0.331 | 0.011 |
| C <sub>2</sub> H <sub>5</sub> N | Aziridine                | 24 | -133.525 | 1.899 | 0.389 | 0.307 | 0.011 |
| NHCHNH <sub>2</sub>             | Aminomethanimine         | 24 | -149.592 | 2.745 | 0.365 | 0.284 | 0.012 |
| C <sub>2</sub> H <sub>4</sub> O | Ethylene Oxide           | 24 | -153.372 | 2.200 | 0.446 | 0.347 | 0.014 |
| CH <sub>3</sub> CHO             | Acetaldehyde             | 24 | -153.416 | 2.628 | 0.422 | 0.289 | 0.031 |
| CHONH <sub>2</sub>              | Formamide                | 24 | -169.461 | 3.761 | 0.415 | 0.308 | 0.018 |
| CH <sub>2</sub> O <sub>2</sub>  | Dioxirane                | 24 | -189.156 | 2.866 | 0.482 | 0.341 | 0.030 |

|                                                 |                       |    |          |       |       |       |       |
|-------------------------------------------------|-----------------------|----|----------|-------|-------|-------|-------|
| HCOOH                                           | Formic Acid           | 24 | -189.304 | 1.299 | 0.468 | 0.324 | 0.032 |
| HNO <sub>2</sub>                                | Nitrous Acid          | 24 | -205.223 | 2.084 | 0.471 | 0.287 | 0.060 |
| O <sub>3</sub>                                  | Ozone                 | 24 | -224.882 | 0.715 | 0.486 | 0.231 | 0.142 |
| FNO                                             | Nitrosyl Fluoride     | 24 | -229.213 | 1.893 | 0.511 | 0.290 | 0.085 |
| CF <sub>2</sub>                                 | Difluoromethylene     | 24 | -237.220 | 0.417 | 0.469 | 0.287 | 0.058 |
| H <sub>2</sub> CS                               | Thioformaldehyde      | 24 | -436.815 | 1.678 | 0.349 | 0.202 | 0.054 |
| SO                                              | Sulfur Monoxide       | 24 | -472.622 | 1.815 | 0.424 | 0.290 | 0.031 |
| CH <sub>3</sub> CHCH <sub>3</sub>               | Isopropyl Radical     | 25 | -118.042 | 1.378 | 0.328 | 0.287 | 0.003 |
| CH <sub>2</sub> CH <sub>2</sub> CH <sub>3</sub> | Npropyl Radical       | 25 | -118.050 | 4.976 | 0.349 | 0.272 | 0.011 |
| CH <sub>3</sub> CHOH                            | Ethoxy Radical        | 25 | -153.397 | 1.131 | 0.464 | 0.353 | 0.018 |
| CH <sub>3</sub> OO                              | Methylperoxy Radical  | 25 | -189.745 | 4.890 | 0.476 | 0.361 | 0.018 |
| FO <sub>2</sub>                                 | Dioxygen Monofluoride | 25 | -249.576 | 1.555 | 0.552 | 0.370 | 0.045 |
| NF <sub>2</sub>                                 | Difluoroamino Radical | 25 | -253.764 | 1.485 | 0.533 | 0.409 | 0.019 |
| CH <sub>3</sub> S                               | Thiomethoxy           | 25 | -437.452 | 0.075 | 0.372 | 0.222 | 0.051 |
| C <sub>3</sub> H <sub>8</sub>                   | Propane               | 26 | -118.750 | 0.076 | 0.467 | 0.350 | 0.019 |

|                                                 |                     |    |          |       |       |       |       |
|-------------------------------------------------|---------------------|----|----------|-------|-------|-------|-------|
| CH <sub>3</sub> NHCH <sub>3</sub>               | Dimethylamine       | 26 | -134.753 | 1.212 | 0.365 | 0.297 | 0.008 |
| CH <sub>3</sub> CH <sub>2</sub> NH <sub>2</sub> | Ethylamine          | 26 | -134.766 | 1.503 | 0.384 | 0.303 | 0.011 |
| CH <sub>3</sub> OCH <sub>3</sub>                | Dimethyl Ether      | 26 | -154.594 | 1.539 | 0.419 | 0.327 | 0.013 |
| CH <sub>3</sub> CH <sub>2</sub> OH              | Ethanol             | 26 | -154.612 | 1.886 | 0.436 | 0.330 | 0.017 |
| CH <sub>3</sub> OOH                             | Methyl Peroxide     | 26 | -190.380 | 1.521 | 0.444 | 0.333 | 0.018 |
| F <sub>2</sub> O                                | Difluorine Monoxide | 26 | -274.101 | 0.405 | 0.569 | 0.363 | 0.059 |
| SiO <sub>2</sub>                                | Silicon Dioxide     | 30 | -439.124 | 0.000 | 0.500 | 0.255 | 0.118 |
| OCS                                             | Carbonyl Sulfide    | 30 | -510.726 | 0.774 | 0.418 | 0.270 | 0.041 |
| ClCN                                            | Chlorocyanogen      | 30 | -551.636 | 5.950 | 0.465 | 0.315 | 0.036 |
| PO <sub>2</sub>                                 | Phosphorus Dioxide  | 31 | -491.029 | 0.202 | 0.470 | 0.258 | 0.087 |
| PS                                              | Phosphorus Sulfide  | 31 | -738.487 | 0.978 | 0.311 | 0.153 | 0.083 |
| SO <sub>2</sub>                                 | Sulfur Dioxide      | 32 | -547.716 | 2.114 | 0.489 | 0.253 | 0.111 |
| ClNO                                            | Nitrosyl Chloride   | 32 | -589.211 | 2.082 | 0.434 | 0.239 | 0.080 |
| S <sub>2</sub>                                  | Sulfur Diatomic     | 32 | -795.264 | 0.000 | 0.384 | 0.257 | 0.032 |
| OCIO                                            | Chlorine Dioxide    | 33 | -609.561 | 2.783 | 0.474 | 0.267 | 0.081 |
| ClO <sub>2</sub>                                | Chlorine Dioxide    | 33 | -609.586 | 1.016 | 0.474 | 0.267 | 0.081 |

|                                    |                      |    |           |       |       |       |       |
|------------------------------------|----------------------|----|-----------|-------|-------|-------|-------|
| CH <sub>3</sub> SCH <sub>3</sub>   | Dimethyl Sulfide     | 34 | -477.214  | 1.635 | 0.334 | 0.265 | 0.009 |
| CH <sub>3</sub> CH <sub>2</sub> SH | Ethanethiol          | 34 | -477.218  | 1.682 | 0.353 | 0.264 | 0.015 |
| SF <sub>2</sub>                    | Sulfur Difluoride    | 34 | -596.892  | 1.658 | 0.396 | 0.247 | 0.045 |
| H <sub>2</sub> S <sub>2</sub>      | Hydrogen Sulfide     | 34 | -796.507  | 1.410 | 0.387 | 0.243 | 0.043 |
| CS <sub>2</sub>                    | Carbon Disulfide     | 38 | -833.302  | 0.000 | 0.372 | 0.214 | 0.059 |
| SSO                                | Disulfur Monoxide    | 40 | -870.246  | 1.431 | 0.404 | 0.186 | 0.128 |
| CCl <sub>2</sub>                   | Dichloromethylene    | 40 | -957.158  | 1.186 | 0.401 | 0.219 | 0.075 |
| MgCl <sub>2</sub>                  | Magnesium Dichloride | 46 | -1119.088 | 0.000 | 0.450 | 0.235 | 0.098 |
| S <sub>3</sub>                     | Sulfur Trimer        | 48 | -1192.913 | 0.871 | 0.361 | 0.146 | 0.158 |
| SiCl <sub>2</sub>                  | Dichlorosilylene     | 48 | -1208.352 | 1.294 | 0.380 | 0.192 | 0.093 |
| ClS <sub>2</sub>                   | Sulfur Chloride      | 49 | -1254.976 | 0.960 | 0.343 | 0.175 | 0.080 |

Table S2. LMC and FS complexities in position (*r*), momentum (*p*) and product (*rp*) spaces.

| <i>Chemical Formula</i>         | <i>Name</i>         | <i>C<sub>r</sub>(LMC)</i> | <i>C<sub>p</sub>(LMC)</i> | <i>C<sub>rp</sub>(LMC)</i> | <i>C<sub>r</sub>(FS)</i> | <i>C<sub>p</sub>(FS)</i> | <i>C<sub>rp</sub>(FS)</i> |
|---------------------------------|---------------------|---------------------------|---------------------------|----------------------------|--------------------------|--------------------------|---------------------------|
| NH <sub>3</sub>                 | Ammonia             | 18.329                    | 4.890                     | 89.633                     | 22.098                   | 6.275                    | 138.665                   |
| LiOH                            | Lithium Hydroxide   | 15.817                    | 4.839                     | 76.545                     | 22.569                   | 6.115                    | 137.998                   |
| Li <sub>2</sub> O               | Dilithium Oxide     | 14.707                    | 4.843                     | 71.226                     | 24.406                   | 6.323                    | 154.319                   |
| HBO                             | Boron Hydride Oxide | 15.921                    | 5.710                     | 90.901                     | 26.266                   | 6.750                    | 177.287                   |
| HCO                             | Formyl Radical      | 20.482                    | 7.614                     | 155.955                    | 32.700                   | 8.300                    | 271.396                   |
| NO                              | Nitric Oxide        | 18.222                    | 7.168                     | 130.609                    | 30.542                   | 7.988                    | 243.978                   |
| H <sub>2</sub> CO               | Formaldehyde        | 16.159                    | 5.408                     | 87.391                     | 28.659                   | 6.678                    | 191.377                   |
| NHO                             | Nitrosyl Hydride    | 15.386                    | 5.329                     | 81.996                     | 28.056                   | 6.753                    | 189.456                   |
| O <sub>2</sub>                  | Oxygen              | 14.269                    | 5.018                     | 71.601                     | 26.625                   | 6.596                    | 175.606                   |
| CH <sub>3</sub> O               | Methoxy Radical     | 21.197                    | 6.553                     | 138.900                    | 35.209                   | 7.551                    | 265.849                   |
| CH <sub>3</sub> NH <sub>2</sub> | Methyl Amine        | 16.455                    | 4.717                     | 77.619                     | 31.372                   | 6.233                    | 195.534                   |
| CH <sub>3</sub> OH              | Methyl Alcohol      | 17.196                    | 5.058                     | 86.977                     | 31.282                   | 6.470                    | 202.402                   |
| NH <sub>2</sub> OH              | Hydroxylamine       | 16.469                    | 5.224                     | 86.038                     | 30.668                   | 6.772                    | 207.692                   |
| H <sub>2</sub> O <sub>2</sub>   | Hydrogen Peroxide   | 15.692                    | 5.298                     | 83.140                     | 29.600                   | 6.966                    | 206.195                   |
| NaOH                            | Sodium Hydroxide    | 16.663                    | 5.765                     | 96.069                     | 30.033                   | 6.786                    | 203.792                   |
| HCCO                            | Ketenyl Radical     | 18.736                    | 5.848                     | 109.576                    | 32.104                   | 7.482                    | 240.193                   |



|             |                     |        |        |         |        |        |          |
|-------------|---------------------|--------|--------|---------|--------|--------|----------|
| $C_3H_3$    | Radical Propargyl   | 14.619 | 5.307  | 77.576  | 34.925 | 6.691  | 233.679  |
| $BO_2$      | Boron Dioxide       | 14.240 | 5.258  | 74.872  | 32.142 | 6.613  | 212.558  |
| $MgOH$      | Magnesium Hydroxide | 28.094 | 21.582 | 606.322 | 42.104 | 24.193 | 1018.634 |
| $CH_2CCH_2$ | Allene              | 14.887 | 5.254  | 78.209  | 36.060 | 6.722  | 242.410  |
| $CH_3CCH$   | Propyne             | 14.859 | 5.204  | 77.322  | 36.012 | 6.642  | 239.193  |
| $C_3H_4$    | Cyclopropene        | 14.859 | 5.204  | 77.322  | 36.012 | 6.642  | 239.193  |
| $CH_3CN$    | Acetonitrile        | 15.147 | 5.375  | 81.417  | 35.842 | 6.795  | 243.557  |
| $CH_3NC$    | Methyl Isocyanide   | 15.179 | 5.395  | 81.893  | 35.998 | 6.680  | 240.459  |
| $CH_2NN$    | Diazomethane        | 14.979 | 5.389  | 80.730  | 35.364 | 6.868  | 242.894  |
| $NH_2CN$    | Cyanamide           | 14.621 | 5.352  | 78.256  | 34.778 | 6.787  | 236.049  |
| $HCCOH$     | Ethynol             | 15.133 | 5.259  | 79.577  | 34.778 | 6.618  | 230.157  |
| $CH_2CO$    | Ketene              | 15.096 | 5.398  | 81.488  | 34.758 | 6.761  | 235.010  |
| $HN_3$      | Hydrogen Azide      | 14.139 | 5.206  | 73.603  | 33.966 | 6.807  | 231.193  |
| $HCNO$      | Fulminic Acid       | 14.556 | 5.252  | 76.453  | 33.987 | 6.747  | 229.303  |
| $HOCN$      | Cyanic Acid         | 14.422 | 5.264  | 75.922  | 33.817 | 6.673  | 225.656  |
| $HNCO$      | Isocyanic Acid      | 14.111 | 5.255  | 74.159  | 33.281 | 6.727  | 223.888  |
| $N_2O$      | Nitrous Oxide       | 13.642 | 4.935  | 67.319  | 32.764 | 6.542  | 214.329  |

|                                 |                          |        |        |         |        |        |         |
|---------------------------------|--------------------------|--------|--------|---------|--------|--------|---------|
| CO <sub>2</sub>                 | Carbon Dioxide           | 13.458 | 4.967  | 66.854  | 31.982 | 6.470  | 206.926 |
| FCN                             | Cyanogen Fluoride        | 14.216 | 5.152  | 73.238  | 32.573 | 6.474  | 210.885 |
| HBS                             | Hydrogen Boron Sulfide   | 39.219 | 12.909 | 506.268 | 45.008 | 13.545 | 609.627 |
| C <sub>3</sub> H <sub>5</sub>   | Allyl Radical            | 18.363 | 5.750  | 105.581 | 42.281 | 7.095  | 299.994 |
| CH <sub>3</sub> CO              | Acetyl Radical           | 19.461 | 6.781  | 131.961 | 41.942 | 8.218  | 344.662 |
| NO <sub>2</sub>                 | Nitrogen Dioxide         | 15.622 | 6.023  | 94.086  | 36.221 | 7.105  | 257.364 |
| PO                              | Phosphorus Monoxide      | 32.401 | 14.006 | 453.829 | 44.319 | 14.029 | 621.770 |
| NS                              | Mononitrogen Monosulfide | 37.529 | 13.892 | 521.334 | 46.670 | 13.788 | 643.470 |
| C <sub>3</sub> H <sub>6</sub>   | Cyclopropane             | 14.573 | 4.700  | 68.496  | 36.814 | 6.216  | 228.832 |
| C <sub>2</sub> H <sub>5</sub> N | Aziridine                | 15.076 | 4.854  | 73.171  | 37.026 | 6.357  | 235.383 |
| NHCHNH <sub>2</sub>             | Aminomethanimine         | 15.284 | 5.025  | 76.799  | 37.056 | 6.458  | 239.322 |
| C <sub>2</sub> H <sub>4</sub> O | Ethylene Oxide           | 15.564 | 5.031  | 78.296  | 36.753 | 6.448  | 236.990 |
| CH <sub>3</sub> CHO             | Acetaldehyde             | 15.986 | 5.219  | 83.430  | 37.453 | 6.557  | 245.587 |
| CHONH <sub>2</sub>              | Formamide                | 15.099 | 5.118  | 77.269  | 36.021 | 6.476  | 233.265 |
| CH <sub>2</sub> O <sub>2</sub>  | Dioxirane                | 15.099 | 5.282  | 79.758  | 35.870 | 6.790  | 243.544 |

|                                                 |                       |        |        |         |        |        |         |
|-------------------------------------------------|-----------------------|--------|--------|---------|--------|--------|---------|
| HCOOH                                           | Formic Acid           | 14.796 | 5.204  | 77.001  | 35.225 | 6.528  | 229.965 |
| HNO <sub>2</sub>                                | Nitrous Acid          | 14.424 | 5.168  | 74.547  | 35.028 | 6.611  | 231.566 |
| O <sub>3</sub>                                  | Ozone                 | 14.057 | 5.075  | 71.342  | 34.472 | 6.660  | 229.580 |
| FNO                                             | Nitrosyl Fluoride     | 14.001 | 5.170  | 72.385  | 33.829 | 6.606  | 223.461 |
| CF <sub>2</sub>                                 | Difluoromethylene     | 14.085 | 5.253  | 73.983  | 33.166 | 6.476  | 214.793 |
| H <sub>2</sub> CS                               | Thioformaldehyde      | 38.934 | 11.926 | 464.325 | 47.354 | 12.728 | 602.734 |
| SO                                              | Sulfur Monoxide       | 28.632 | 9.671  | 276.908 | 40.560 | 10.750 | 436.024 |
| CH <sub>3</sub> CHCH <sub>3</sub>               | Isopropyl Radical     | 18.342 | 5.215  | 95.647  | 43.754 | 6.616  | 289.479 |
| CH <sub>2</sub> CH <sub>2</sub> CH <sub>3</sub> | Npropyl Radical       | 18.640 | 5.284  | 98.489  | 44.232 | 6.656  | 294.427 |
| CH <sub>3</sub> CHOH                            | Ethoxy Radical        | 15.947 | 5.118  | 81.609  | 37.328 | 6.479  | 241.853 |
| CH <sub>3</sub> OO                              | Methylperoxy Radical  | 18.130 | 6.056  | 109.797 | 41.062 | 7.142  | 293.257 |
| FO <sub>2</sub>                                 | Dioxygen Monofluoride | 15.576 | 5.928  | 92.339  | 36.994 | 7.197  | 266.258 |
| NF <sub>2</sub>                                 | Difluoroamino Radical | 15.602 | 6.039  | 94.216  | 36.560 | 7.173  | 262.231 |
| CH <sub>3</sub> S                               | Thiomethoxy           | 48.622 | 14.312 | 695.908 | 55.725 | 13.947 | 777.211 |
| C <sub>3</sub> H <sub>8</sub>                   | Propane               | 15.184 | 4.475  | 67.955  | 39.247 | 6.051  | 237.486 |

|                                                 |                     |        |        |         |        |        |         |
|-------------------------------------------------|---------------------|--------|--------|---------|--------|--------|---------|
| CH <sub>3</sub> NHCH <sub>3</sub>               | Dimethylamine       | 15.823 | 4.645  | 73.503  | 39.583 | 6.168  | 244.134 |
| CH <sub>3</sub> CH <sub>2</sub> NH <sub>2</sub> | Ethylamine          | 15.794 | 4.632  | 73.166  | 39.522 | 6.169  | 243.825 |
| CH <sub>3</sub> OCH <sub>3</sub>                | Dimethyl Ether      | 16.602 | 4.888  | 81.144  | 39.681 | 6.289  | 249.561 |
| CH <sub>3</sub> CH <sub>2</sub> OH              | Ethanol             | 16.492 | 4.847  | 79.941  | 39.477 | 6.311  | 249.153 |
| CH <sub>3</sub> OOH                             | Methyl Peroxide     | 16.305 | 5.139  | 83.786  | 38.912 | 6.599  | 256.795 |
| F <sub>2</sub> O                                | Difluorine Monoxide | 13.780 | 5.021  | 69.189  | 34.504 | 6.686  | 230.701 |
| SiO <sub>2</sub>                                | Silicon Dioxide     | 21.279 | 7.197  | 153.135 | 42.587 | 8.418  | 358.485 |
| OCS                                             | Carbonyl Sulfide    | 29.439 | 8.637  | 254.249 | 47.959 | 9.847  | 472.247 |
| ClCN                                            | Chlorocyanogen      | 34.096 | 9.156  | 312.185 | 50.455 | 10.743 | 542.020 |
| PO <sub>2</sub>                                 | Phosphorus Dioxide  | 26.608 | 9.562  | 254.412 | 48.502 | 10.036 | 486.758 |
| PS                                              | Phosphorus Sulfide  | 33.482 | 18.602 | 622.825 | 53.355 | 18.347 | 978.882 |
| SO <sub>2</sub>                                 | Sulfur Dioxide      | 25.582 | 8.033  | 205.489 | 46.479 | 9.105  | 423.187 |
| ClNO                                            | Nitrosyl Chloride   | 31.033 | 9.169  | 284.526 | 50.569 | 10.255 | 518.602 |
| S <sub>2</sub>                                  | Sulfur Diatomic     | 29.557 | 13.830 | 408.768 | 49.503 | 15.541 | 769.315 |
| OCIO                                            | Chlorine Dioxide    | 30.434 | 9.286  | 282.608 | 51.335 | 10.152 | 521.178 |
| ClO <sub>2</sub>                                | Chlorine Dioxide    | 31.652 | 9.814  | 310.638 | 52.740 | 10.507 | 554.167 |

|                                    |                      |        |        |         |        |        |          |
|------------------------------------|----------------------|--------|--------|---------|--------|--------|----------|
| CH <sub>3</sub> SCH <sub>3</sub>   | Dimethyl Sulfide     | 43.179 | 8.841  | 381.755 | 62.193 | 10.184 | 633.383  |
| CH <sub>3</sub> CH <sub>2</sub> SH | Ethanethiol          | 43.193 | 9.148  | 395.128 | 62.192 | 10.349 | 643.612  |
| SF <sub>2</sub>                    | Sulfur Difluoride    | 23.088 | 7.614  | 175.794 | 45.869 | 8.693  | 398.764  |
| H <sub>2</sub> S <sub>2</sub>      | Hydrogen Sulfide     | 33.365 | 14.977 | 499.718 | 54.844 | 15.983 | 876.593  |
| CS <sub>2</sub>                    | Carbon Disulfide     | 31.540 | 11.615 | 366.320 | 57.500 | 13.232 | 760.837  |
| SSO                                | Disulfur Monoxide    | 28.568 | 11.232 | 320.885 | 56.396 | 12.275 | 692.232  |
| CCl <sub>2</sub>                   | Dichloromethylene    | 33.193 | 12.496 | 414.800 | 59.796 | 13.525 | 808.719  |
| MgCl <sub>2</sub>                  | Magnesium Dichloride | 27.977 | 11.443 | 320.138 | 60.209 | 12.364 | 744.450  |
| S <sub>3</sub>                     | Sulfur Trimer        | 29.189 | 13.970 | 407.786 | 64.165 | 15.508 | 995.053  |
| SiCl <sub>2</sub>                  | Dichlorosilylene     | 29.108 | 13.964 | 406.462 | 63.384 | 14.697 | 931.524  |
| ClS <sub>2</sub>                   | Sulfur Chloride      | 31.640 | 15.477 | 489.713 | 68.048 | 15.910 | 1082.619 |

Table S3. Information measures  $I$ ,  $J$ ,  $D$  and  $L$  in position ( $r$ ) and momentum ( $p$ ) spaces.

| <i>Chemical Formula</i>         | <i>Name</i>         | $I_r$  | $I_p$ | $J_r$ | $J_p$ | $D_r$ | $D_p$ | $L_r$  | $L_p$   |
|---------------------------------|---------------------|--------|-------|-------|-------|-------|-------|--------|---------|
| NH <sub>3</sub>                 | Ammonia             | 35.359 | 3.951 | 0.625 | 1.588 | 0.526 | 0.035 | 34.873 | 141.252 |
| LiOH                            | Lithium Hydroxide   | 42.817 | 2.871 | 0.527 | 2.130 | 0.586 | 0.022 | 27.011 | 219.366 |
| Li <sub>2</sub> O               | Dilithium Oxide     | 40.522 | 3.028 | 0.602 | 2.088 | 0.446 | 0.023 | 32.993 | 212.967 |
| HBO                             | Boron Hydride Oxide | 44.908 | 3.083 | 0.585 | 2.189 | 0.504 | 0.025 | 31.573 | 228.637 |
| HCO                             | Formyl Radical      | 47.148 | 3.727 | 0.694 | 2.227 | 0.502 | 0.032 | 40.769 | 234.576 |
| NO                              | Nitric Oxide        | 53.282 | 3.066 | 0.573 | 2.605 | 0.595 | 0.024 | 30.633 | 296.801 |
| H <sub>2</sub> CO               | Formaldehyde        | 44.410 | 3.103 | 0.645 | 2.152 | 0.442 | 0.024 | 36.591 | 222.885 |
| NHO                             | Nitrosyl Hydride    | 50.288 | 2.734 | 0.558 | 2.470 | 0.523 | 0.019 | 29.415 | 273.967 |
| O <sub>2</sub>                  | Oxygen              | 57.172 | 2.309 | 0.466 | 2.856 | 0.636 | 0.015 | 22.433 | 340.759 |
| CH <sub>3</sub> O               | Methoxy Radical     | 41.945 | 3.951 | 0.839 | 1.911 | 0.390 | 0.035 | 54.285 | 186.471 |
| CH <sub>3</sub> NH <sub>2</sub> | Methyl Amine        | 33.729 | 4.042 | 0.930 | 1.542 | 0.260 | 0.035 | 63.319 | 135.176 |
| CH <sub>3</sub> OH              | Methyl Alcohol      | 39.736 | 3.451 | 0.787 | 1.875 | 0.349 | 0.028 | 49.302 | 181.200 |
| NH <sub>2</sub> OH              | Hydroxylamine       | 44.865 | 3.073 | 0.684 | 2.204 | 0.413 | 0.023 | 39.892 | 230.958 |
| H <sub>2</sub> O <sub>2</sub>   | Hydrogen Peroxide   | 50.972 | 2.671 | 0.581 | 2.608 | 0.502 | 0.018 | 31.235 | 297.351 |
| NaOH                            | Sodium Hydroxide    | 67.031 | 1.867 | 0.448 | 3.635 | 0.787 | 0.012 | 21.169 | 489.255 |
| HCCO                            | Ketenyl Radical     | 45.164 | 3.759 | 0.711 | 1.990 | 0.443 | 0.030 | 42.302 | 198.209 |

|                                  |                     |        |       |       |       |       |       |        |         |
|----------------------------------|---------------------|--------|-------|-------|-------|-------|-------|--------|---------|
| C <sub>3</sub> H <sub>3</sub>    | Radical Propargyl   | 35.850 | 3.973 | 0.974 | 1.684 | 0.215 | 0.034 | 67.870 | 154.263 |
| BO <sub>2</sub>                  | Boron Dioxide       | 51.429 | 2.501 | 0.625 | 2.644 | 0.408 | 0.017 | 34.874 | 303.534 |
| MgOH                             | Magnesium Hydroxide | 72.165 | 6.982 | 0.583 | 3.465 | 0.893 | 0.047 | 31.457 | 455.310 |
| CH <sub>2</sub> CCH <sub>2</sub> | Allene              | 34.380 | 4.181 | 1.049 | 1.608 | 0.196 | 0.037 | 75.823 | 143.893 |
| CH <sub>3</sub> CCH              | Propyne             | 34.372 | 4.154 | 1.048 | 1.599 | 0.196 | 0.036 | 75.698 | 142.733 |
| C <sub>3</sub> H <sub>4</sub>    | Cyclopropene        | 34.372 | 4.154 | 1.048 | 1.599 | 0.196 | 0.036 | 75.698 | 142.733 |
| CH <sub>3</sub> CN               | Acetonitrile        | 38.577 | 3.710 | 0.929 | 1.831 | 0.240 | 0.031 | 63.212 | 174.949 |
| CH <sub>3</sub> NC               | Methyl Isocyanide   | 38.665 | 3.655 | 0.931 | 1.828 | 0.239 | 0.031 | 63.408 | 174.421 |
| CH <sub>2</sub> NN               | Diazomethane        | 42.763 | 3.341 | 0.827 | 2.056 | 0.282 | 0.026 | 53.081 | 208.023 |
| NH <sub>2</sub> CN               | Cyanamide           | 42.721 | 3.243 | 0.814 | 2.093 | 0.282 | 0.025 | 51.843 | 213.709 |
| HCCOH                            | Ethynol             | 43.351 | 3.159 | 0.802 | 2.095 | 0.298 | 0.025 | 50.718 | 214.029 |
| CH <sub>2</sub> CO               | Ketene              | 43.450 | 3.188 | 0.800 | 2.121 | 0.299 | 0.025 | 50.501 | 217.992 |
| HN <sub>3</sub>                  | Hydrogen Azide      | 46.920 | 2.946 | 0.724 | 2.311 | 0.325 | 0.021 | 43.476 | 247.947 |
| HCNO                             | Fulminic Acid       | 47.560 | 2.860 | 0.715 | 2.359 | 0.341 | 0.021 | 42.641 | 255.808 |
| HOCN                             | Cyanic Acid         | 47.639 | 2.807 | 0.710 | 2.377 | 0.342 | 0.020 | 42.216 | 258.724 |
| HNCO                             | Isocyanic Acid      | 47.582 | 2.792 | 0.699 | 2.409 | 0.342 | 0.020 | 41.290 | 263.993 |
| N <sub>2</sub> O                 | Nitrous Oxide       | 51.862 | 2.551 | 0.632 | 2.565 | 0.385 | 0.017 | 35.444 | 289.908 |

|                                 |                          |        |       |       |       |       |       |         |         |
|---------------------------------|--------------------------|--------|-------|-------|-------|-------|-------|---------|---------|
| CO <sub>2</sub>                 | Carbon Dioxide           | 52.542 | 2.408 | 0.609 | 2.687 | 0.401 | 0.016 | 33.521  | 310.842 |
| FCN                             | Cyanogen Fluoride        | 53.291 | 2.381 | 0.611 | 2.719 | 0.421 | 0.016 | 33.730  | 316.488 |
| HBS                             | Hydrogen Boron Sulfide   | 95.653 | 3.402 | 0.471 | 3.982 | 1.721 | 0.023 | 22.782  | 560.801 |
| C <sub>3</sub> H <sub>5</sub>   | Allyl Radical            | 33.000 | 4.950 | 1.281 | 1.433 | 0.179 | 0.047 | 102.365 | 121.145 |
| CH <sub>3</sub> CO              | Acetyl Radical           | 41.737 | 4.253 | 1.005 | 1.932 | 0.274 | 0.036 | 71.105  | 189.554 |
| NO <sub>2</sub>                 | Nitrogen Dioxide         | 54.331 | 2.580 | 0.667 | 2.754 | 0.407 | 0.019 | 38.422  | 322.651 |
| PO                              | Phosphorus Monoxide      | 93.118 | 3.147 | 0.476 | 4.458 | 1.398 | 0.021 | 23.176  | 664.281 |
| NS                              | Mononitrogen Monosulfide | 98.935 | 3.131 | 0.472 | 4.403 | 1.641 | 0.021 | 22.869  | 652.189 |
| C <sub>3</sub> H <sub>6</sub>   | Cyclopropane             | 31.688 | 4.197 | 1.162 | 1.481 | 0.165 | 0.037 | 88.384  | 127.209 |
| C <sub>2</sub> H <sub>5</sub> N | Aziridine                | 35.547 | 3.795 | 1.042 | 1.675 | 0.201 | 0.032 | 75.036  | 153.063 |
| NHCHNH <sub>2</sub>             | Aminomethanimine         | 39.358 | 3.440 | 0.942 | 1.877 | 0.237 | 0.028 | 64.484  | 181.539 |
| C <sub>2</sub> H <sub>4</sub> O | Ethylene Oxide           | 40.077 | 3.343 | 0.917 | 1.929 | 0.251 | 0.027 | 61.989  | 189.055 |
| CH <sub>3</sub> CHO             | Acetaldehyde             | 40.139 | 3.418 | 0.933 | 1.919 | 0.251 | 0.028 | 63.621  | 187.575 |
| CHONH <sub>2</sub>              | Formamide                | 43.829 | 2.985 | 0.822 | 2.169 | 0.287 | 0.023 | 52.590  | 225.540 |
| CH <sub>2</sub> O <sub>2</sub>  | Dioxirane                | 48.619 | 2.763 | 0.738 | 2.457 | 0.338 | 0.019 | 44.730  | 271.863 |



|                                                 |                       |        |       |       |       |       |       |         |         |
|-------------------------------------------------|-----------------------|--------|-------|-------|-------|-------|-------|---------|---------|
| HCOOH                                           | Formic Acid           | 48.366 | 2.641 | 0.728 | 2.472 | 0.337 | 0.019 | 43.871  | 274.330 |
| HNO <sub>2</sub>                                | Nitrous Acid          | 52.388 | 2.476 | 0.669 | 2.670 | 0.374 | 0.017 | 38.591  | 307.969 |
| O <sub>3</sub>                                  | Ozone                 | 57.042 | 2.273 | 0.604 | 2.930 | 0.424 | 0.014 | 33.161  | 354.055 |
| FNO                                             | Nitrosyl Fluoride     | 57.622 | 2.179 | 0.587 | 3.032 | 0.441 | 0.014 | 31.752  | 372.608 |
| CF <sub>2</sub>                                 | Difluoromethylene     | 58.849 | 2.027 | 0.564 | 3.196 | 0.472 | 0.013 | 29.864  | 403.204 |
| H <sub>2</sub> CS                               | Thioformaldehyde      | 91.074 | 3.216 | 0.520 | 3.958 | 1.471 | 0.021 | 26.464  | 555.725 |
| SO                                              | Sulfur Monoxide       | 99.453 | 2.257 | 0.408 | 4.762 | 1.557 | 0.013 | 18.384  | 733.511 |
| CH <sub>3</sub> CHCH <sub>3</sub>               | Isopropyl Radical     | 30.608 | 4.986 | 1.430 | 1.327 | 0.152 | 0.048 | 120.639 | 107.892 |
| CH <sub>2</sub> CH <sub>2</sub> CH <sub>3</sub> | Npropyl Radical       | 30.608 | 5.061 | 1.445 | 1.315 | 0.152 | 0.050 | 122.622 | 106.476 |
| CH <sub>3</sub> CHOH                            | Ethoxy Radical        | 40.048 | 3.403 | 0.932 | 1.904 | 0.251 | 0.028 | 63.517  | 185.402 |
| CH <sub>3</sub> OO                              | Methylperoxy Radical  | 46.628 | 3.180 | 0.881 | 2.246 | 0.311 | 0.025 | 58.331  | 237.541 |
| FO <sub>2</sub>                                 | Dioxygen Monofluoride | 59.692 | 2.315 | 0.620 | 3.109 | 0.452 | 0.015 | 34.438  | 386.854 |
| NF <sub>2</sub>                                 | Difluoroamino Radical | 60.253 | 2.234 | 0.607 | 3.211 | 0.468 | 0.015 | 33.362  | 406.065 |
| CH <sub>3</sub> S                               | Thiomethoxy           | 87.510 | 3.862 | 0.637 | 3.612 | 1.356 | 0.030 | 35.868  | 484.462 |
| C <sub>3</sub> H <sub>8</sub>                   | Propane               | 29.589 | 4.508 | 1.326 | 1.342 | 0.141 | 0.041 | 107.825 | 109.781 |

|                                                 |                     |         |       |       |       |       |       |        |         |
|-------------------------------------------------|---------------------|---------|-------|-------|-------|-------|-------|--------|---------|
| CH <sub>3</sub> NHCH <sub>3</sub>               | Dimethylamine       | 33.093  | 4.072 | 1.196 | 1.515 | 0.171 | 0.035 | 92.334 | 131.596 |
| CH <sub>3</sub> CH <sub>2</sub> NH <sub>2</sub> | Ethylamine          | 33.089  | 4.080 | 1.194 | 1.512 | 0.171 | 0.035 | 92.142 | 131.252 |
| CH <sub>3</sub> OCH <sub>3</sub>                | Dimethyl Ether      | 37.259  | 3.626 | 1.065 | 1.734 | 0.214 | 0.030 | 77.576 | 161.232 |
| CH <sub>3</sub> CH <sub>2</sub> OH              | Ethanol             | 37.242  | 3.639 | 1.060 | 1.734 | 0.214 | 0.030 | 77.032 | 161.232 |
| CH <sub>3</sub> OOH                             | Methyl Peroxide     | 45.030  | 3.016 | 0.864 | 2.188 | 0.288 | 0.022 | 56.702 | 228.464 |
| F <sub>2</sub> O                                | Difluorine Monoxide | 62.458  | 1.983 | 0.552 | 3.372 | 0.475 | 0.011 | 28.982 | 437.147 |
| SiO <sub>2</sub>                                | Silicon Dioxide     | 78.996  | 2.080 | 0.539 | 4.048 | 0.762 | 0.013 | 27.939 | 574.802 |
| OCS                                             | Carbonyl Sulfide    | 87.733  | 2.483 | 0.547 | 3.966 | 1.032 | 0.015 | 28.528 | 557.507 |
| ClCN                                            | Chlorocyanogen      | 92.739  | 2.670 | 0.544 | 4.024 | 1.204 | 0.016 | 28.325 | 569.800 |
| PO <sub>2</sub>                                 | Phosphorus Dioxide  | 83.663  | 2.406 | 0.580 | 4.172 | 0.854 | 0.016 | 31.157 | 601.416 |
| PS                                              | Phosphorus Sulfide  | 116.668 | 3.329 | 0.457 | 5.512 | 1.534 | 0.020 | 21.829 | 913.419 |
| SO <sub>2</sub>                                 | Sulfur Dioxide      | 88.687  | 2.040 | 0.524 | 4.464 | 0.955 | 0.012 | 26.780 | 665.719 |
| ClNO                                            | Nitrosyl Chloride   | 93.484  | 2.329 | 0.541 | 4.403 | 1.105 | 0.014 | 28.082 | 652.087 |
| S <sub>2</sub>                                  | Sulfur Diatomic     | 120.651 | 2.681 | 0.410 | 5.796 | 1.593 | 0.014 | 18.551 | 984.958 |
| OClO                                            | Chlorine Dioxide    | 93.811  | 2.236 | 0.547 | 4.541 | 1.065 | 0.014 | 28.573 | 683.123 |
| ClO <sub>2</sub>                                | Chlorine Dioxide    | 93.908  | 2.337 | 0.562 | 4.497 | 1.065 | 0.015 | 29.708 | 673.077 |

|                                    |                      |         |       |       |       |       |       |        |          |
|------------------------------------|----------------------|---------|-------|-------|-------|-------|-------|--------|----------|
| CH <sub>3</sub> SCH <sub>3</sub>   | Dimethyl Sulfide     | 71.901  | 3.629 | 0.865 | 2.806 | 0.760 | 0.027 | 56.783 | 331.815  |
| CH <sub>3</sub> CH <sub>2</sub> SH | Ethanethiol          | 71.886  | 3.604 | 0.865 | 2.872 | 0.760 | 0.027 | 56.799 | 343.484  |
| SF <sub>2</sub>                    | Sulfur Difluoride    | 90.936  | 1.799 | 0.504 | 4.832 | 0.913 | 0.010 | 25.287 | 749.769  |
| H <sub>2</sub> S <sub>2</sub>      | Hydrogen Sulfide     | 113.715 | 2.896 | 0.482 | 5.519 | 1.411 | 0.016 | 23.642 | 915.087  |
| CS <sub>2</sub>                    | Carbon Disulfide     | 108.093 | 2.762 | 0.532 | 4.790 | 1.152 | 0.016 | 27.385 | 740.069  |
| SSO                                | Disulfur Monoxide    | 107.860 | 2.281 | 0.523 | 5.382 | 1.071 | 0.013 | 26.687 | 881.223  |
| CCl <sub>2</sub>                   | Dichloromethylene    | 115.767 | 2.464 | 0.517 | 5.490 | 1.267 | 0.014 | 26.202 | 907.920  |
| MgCl <sub>2</sub>                  | Magnesium Dichloride | 118.212 | 2.129 | 0.509 | 5.808 | 1.090 | 0.012 | 25.658 | 987.999  |
| S <sub>3</sub>                     | Sulfur Trimer        | 120.348 | 2.613 | 0.533 | 5.935 | 1.062 | 0.014 | 27.479 | 1020.606 |
| SiCl <sub>2</sub>                  | Dichlorosilylene     | 121.417 | 2.349 | 0.522 | 6.257 | 1.093 | 0.013 | 26.623 | 1104.761 |
| ClS <sub>2</sub>                   | Sulfur Chloride      | 123.420 | 2.643 | 0.551 | 6.020 | 1.095 | 0.015 | 28.897 | 1042.597 |
